# Supplementary material
Source: PubMed Central journal article supplement (PMC7613048)
Supplement: EMS147095-supplement-Supplementary_Figures.pdf [file EMS147095-supplement-Supplementary_Figures.pdf]

**Supplementary Table 1:** Design and hit selection methods for the three siRNA studies of early HIV dependency factors by Zhou *et al.*, Brass *et al.*, and König *et al.*

|                                                               |                                      | <i>Zhou et al.</i>                                                      | <i>Brass et al.</i>                                | <i>König et al.</i>                                                                                                                                                                                                        |
|---------------------------------------------------------------|--------------------------------------|-------------------------------------------------------------------------|----------------------------------------------------|----------------------------------------------------------------------------------------------------------------------------------------------------------------------------------------------------------------------------|
| <i>Experimental Conditions And Design</i>                     | Cell Type                            | HeLa P4/R5 Cells                                                        | HeLa-derived TZM-bl Cells                          | 293T Cells                                                                                                                                                                                                                 |
|                                                               | Treatment                            | HXB2 HIV- 1                                                             | HIV IIIIB                                          | VSV-G pseudotyped HIV-1 reporter virus encoding luciferase                                                                                                                                                                 |
|                                                               | Readout 1                            | Tat activation of expression of the $\beta$ -Gal reporter               | p24 (product of gag gene)                          | HIV-1 Vector encoded luciferase                                                                                                                                                                                            |
|                                                               | Time point: Readout 1                | 48h                                                                     | 48h                                                | 24h                                                                                                                                                                                                                        |
|                                                               | Readout 2                            | Tat activation of expression of the $\beta$ -Gal reporter               | $\beta$ -Gal (Tat dependent)                       | MuLV and AAV                                                                                                                                                                                                               |
|                                                               | Time point: Readout 2                | 96h                                                                     | 72h                                                | 24h                                                                                                                                                                                                                        |
| <i>Hit Selection, Bioinformatics, and Secondary Screening</i> | Cell Viability Correction            | Decrease of cell viability by 2 SDs or more                             | Decrease of cell viability by 2 SDs or more        | Cell toxicity screen                                                                                                                                                                                                       |
|                                                               | Z score cutoff                       | 2 SSMD relative to the negative control                                 | 2 SDs greater than the plate mean                  | 2 siRNAs with $\geq 45\%$ reduction in HIV infectivity                                                                                                                                                                     |
|                                                               | Bioinformatics Used in Hit Selection | In silico screening for expression in activated T cells and Macrophages | None                                               | "evidence score" based on functional, biochemical, and transcriptional data. Yeast to hybrid protein interaction database, NCBI HIV-1 Protein Interaction Database, MCODE, Ontogeny-based pattern identification algorithm |
|                                                               | Secondary Screening                  | Rescreening by independent siRNAs                                       | Rescreening of pooled siRNAs in single siRNA assay | Rescreening of pooled siRNAs in single siRNA assay                                                                                                                                                                         |

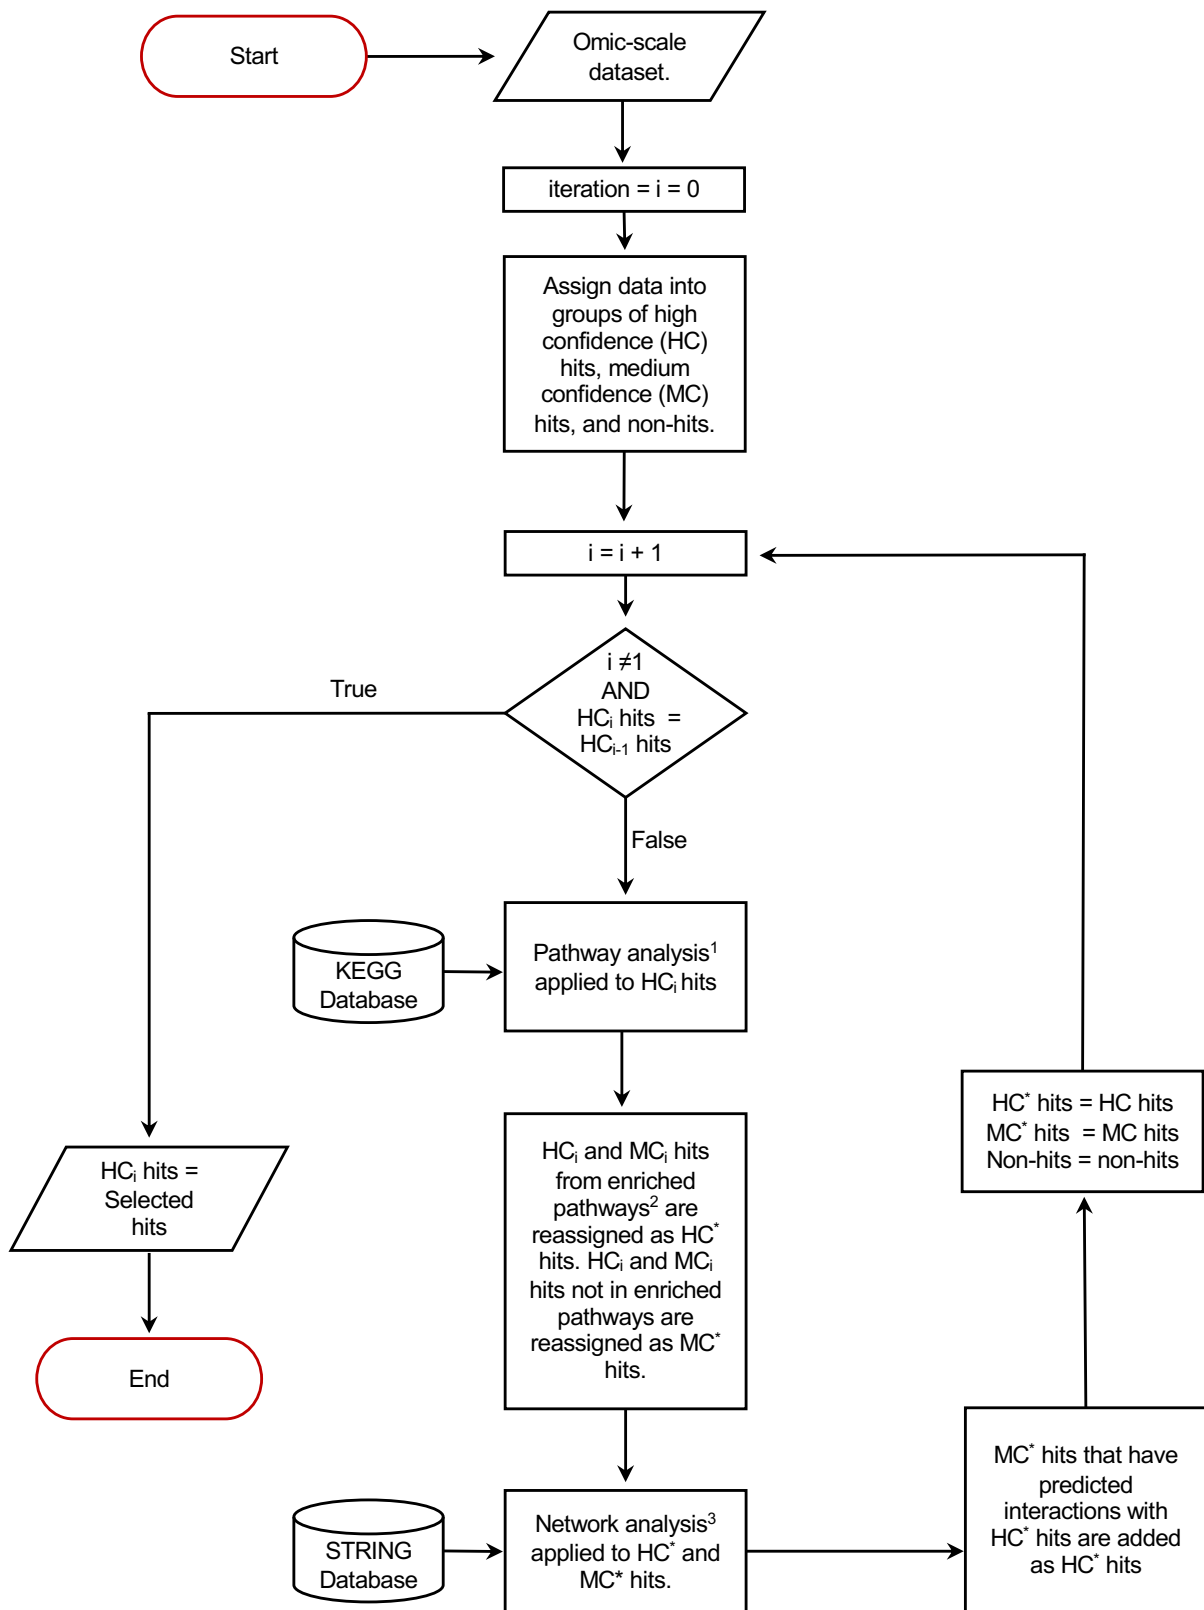

1. Hypergeometric test, alternative hypothesis = "greater than", null hypothesis = no shared enrichment.
2.  $p < 0.05$
3. Direct neighbor functional approach, evidence source: Experimental & Database, Confidence  $\geq 0.4$

**Supplementary Figure 1 (related to figure 3D): Hit selection by iterative application of pathway and network analysis.**

Flowchart of the Selection by Iterative pathway Group and Network Analysis Looping (SIGNAL) hit selection pipeline.

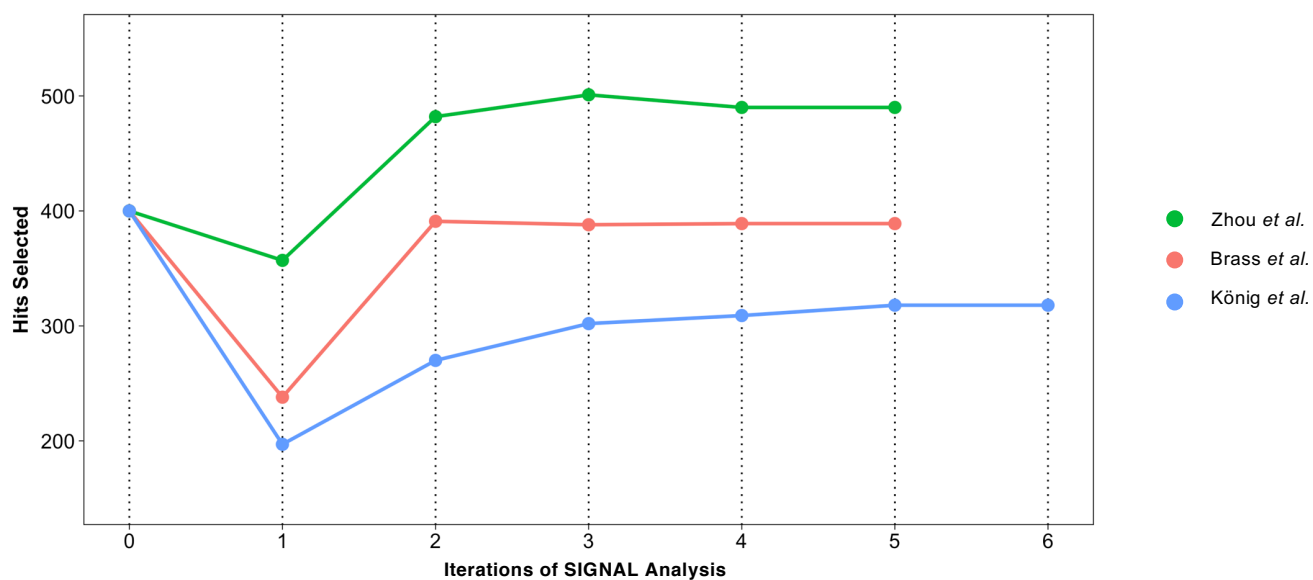

**Supplementary Figure 2 (related to figure 3D): Iterations of integrated analysis of the three studies of HIV HDFs.**

0 on the x-axis represents the high confidence set of hits at the analysis input stage. The high confidence hit sets are contracted and expanded through iterative analysis cycles. Analysis terminates when high confidence sets do not change between two consecutive iterations.

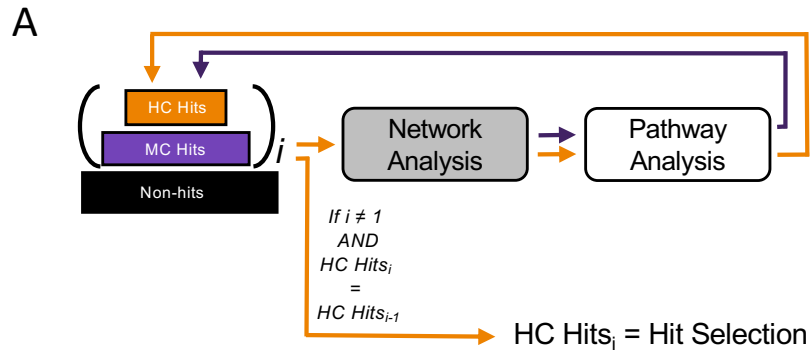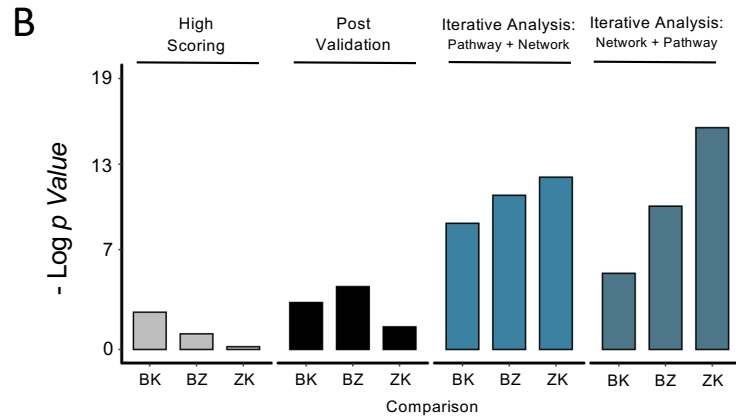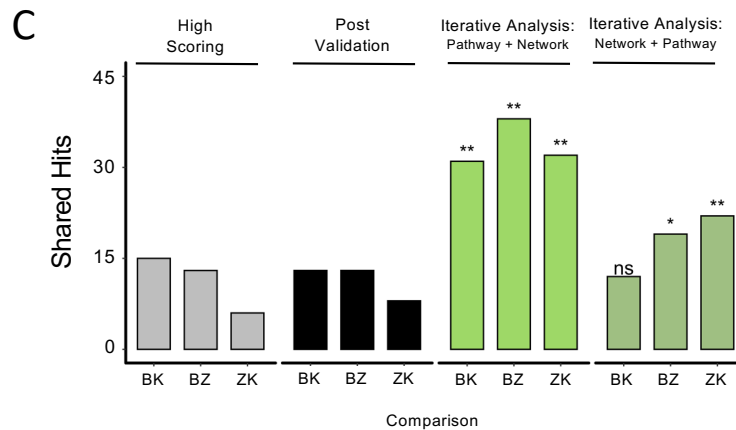

Z = Zhou *et al.*, B = Brass *et al.*, K = König *et al.*

### Supplementary Figure 3: Hit selection by iterative analysis with reverse pathway and network order.

(A) Schematic of the iterative analysis as in Fig. 3D with the order of pathway and network analysis reversed. (B) statistical significance of the overlap across the three studies of HDFs when comparing hits selected by reverse iterative analysis versus highest scoring hits, post validation hits and hits selected by the alternative design of iterative analysis. (C) Number of shared hits between the hits selected by reverse iterative analysis from the three studies versus highest scoring hits, post validation hits and hits selected by the alternative design of iterative analysis.. Random permutation test scores: ns =  $p > 0.05$ , \* =  $p \leq 0.05$ , \*\* =  $p \leq 0.01$

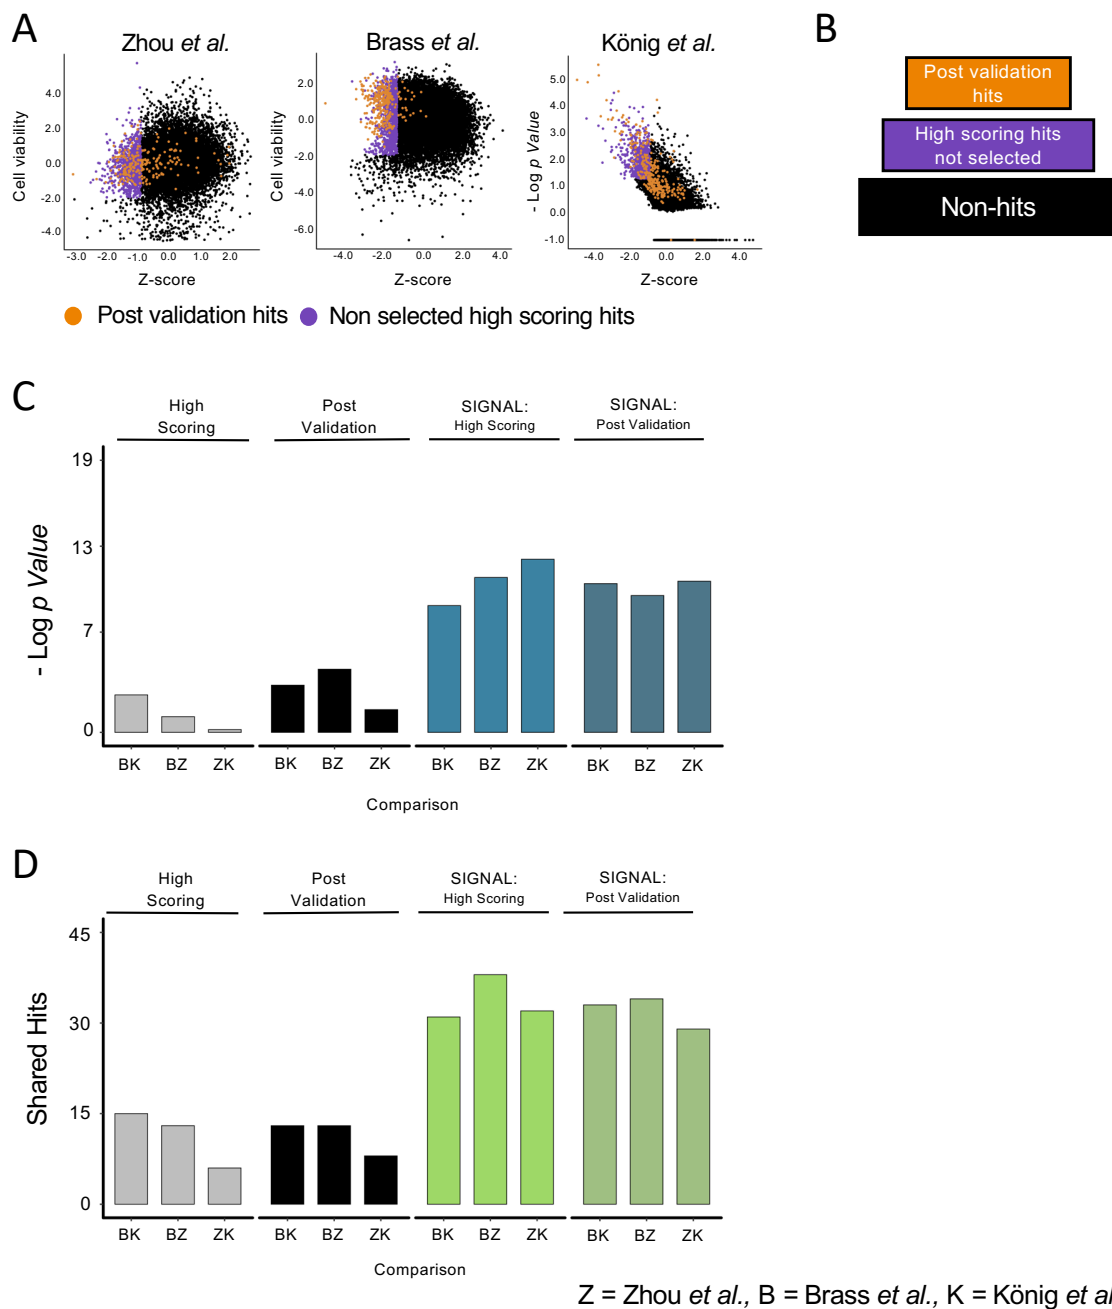

### Supplementary Figure 4: Using post-validation hits for analysis by SIGNAL.

(A) Scores from three genome-wide studies of HDFs. Post-validation hits are in orange and the highest scoring 1000 genes not selected are in purple. (B) Schematic of three-tiered data using post validation hits as high confidence hits, and non-selected high scoring hits as medium confidence hits. (C) Statistical significance of the overlap across the three studies of HDF when comparing hits selected by SIGNAL analysis of post validation hits versus highest scoring hits, post validation hits, and hits selected by SIGNAL analysis of high scoring hits. (D) Number of shared hits between the hits selected by SIGNAL analysis of post validation hits versus highest scoring hits, post validation hits, and hits selected by SIGNAL analysis of high scoring hits. Random permutation test scores: ns =  $p > 0.05$ , \* =  $p \leq 0.05$ , \*\* =  $p \leq 0.01$

| GeneSymbol | EntrezID | PercInfected.Zscore | CellNumber.Zscore | assigned.value |
|------------|----------|---------------------|-------------------|----------------|
| CXCR4      | 7852     | -4.96623446         | 0.755277194       | 1              |
| C1orf52    | 148423   | -3.637572822        | 1.925896515       | 1              |
| MED14      | 9282     | -3.435696475        | 0.976086257       | 1              |
| ADAM10     | 102      | -3.435673997        | 1.513583032       | 1              |
| GCK        | 2645     | -3.223640638        | 1.920937941       | 1              |
| GPR21      | 2844     | -3.201246647        | -0.096137148      | 1              |
| ZNF831     | 128611   | -3.20098761         | -0.243515999      | 1              |
| CD4        | 920      | -3.162525347        | 1.767687649       | 1              |
| EGFR       | 1956     | -3.162525347        | 1.487870985       | 1              |
| WNT1       | 7471     | -3.140163554        | 1.674727332       | 1              |
| USP6       | 9098     | -3.114415882        | 1.238823011       | 1              |
| PLEKHA7    | 144100   | -1.920126088        | -1.705268716      | 0.5            |
| DPH3       | 285381   | -1.919642212        | -0.473272261      | 0.5            |
| NA         | 284861   | -1.919642212        | -0.200375892      | 0.5            |
| PNMA6A     | 84968    | -1.917641072        | -1.574602053      | 0.5            |
| EIF3G      | 8666     | -1.917428352        | -1.51997327       | 0.5            |
| TFDP2      | 7029     | -1.916264377        | 1.3078323         | 0.5            |
| CLNS1A     | 1207     | -1.915660931        | 0.543313511       | 0.5            |
| MMP19      | 4327     | -1.90908986         | 1.426094148       | 0.5            |
| RECQL4     | 9401     | -1.90908986         | 1.167972495       | 0.5            |
| ZNF536     | 9745     | -1.909010831        | -0.111569716      | 0.5            |
| NMUR2      | 56923    | -3.690591512        | -2.63385185       | 0              |
| SMU1       | 55234    | -3.686455305        | -3.076050904      | 0              |
| LSM8       | 51691    | -3.62462392         | -2.307921727      | 0              |
| NAT10      | 55226    | -3.460889184        | -2.681841646      | 0              |
| SGO1       | 151648   | -3.435116303        | -4.066983289      | 0              |
| DHRS13     | 147015   | -3.38711184         | -2.495038806      | 0              |
| XAB2       | 56949    | -3.327710602        | -3.064859872      | 0              |
| HEG1       | 57493    | -3.291433863        | -2.728928693      | 0              |
| COPB2      | 9276     | -3.28475593         | -4.284378793      | 0              |
| PSMB6      | 5694     | -3.261635121        | -3.280551426      | 0              |

**Supplementary Figure 5 (related to figure 6A): A sample input file for SIGNAL.**

A sample dataset prepared for SIGNAL analyses using the data from the Brass *et al.* of study of essential factors for HIV infection. Gene column IDs are labeled as “EntrezID” and “GeneSymbol” (either one is sufficient for upload). The “PercInfected.Zscore” column includes the normalized Z scores and can be used to set cutoffs for the high confidence and medium confidence fields on the SIGNAL platform. To incorporate the “CellNumber.Zscore” in defining high confidence vs. medium confidence hits, a new column is created “assigned.value”. Hits assigned as high confidence by both criteria are given a value of 1, hits assigned as medium confidence are given a value of 0.5. Hits that don’t meet the two criteria are assigned a value of 0.

Select "Human" or "Mouse" based on the gene IDs used in the dataset.

Select whether to use interactions from the STRING database with Experimental and Database evidence sources or select "Advanced Options" to manually select which evidence sources to include.

Click on the "Browse" button to locate the upload file in your computer. The progress bar will show when the upload is complete.

Type in a number to be used as a cutoff for high confidence hits. (Can be greater than or less than).

Select this to use an additional column with numeric values to be used as a cutoff that all hits must meet.

Select this option if your upload file only includes a list of hits or if only a fraction of the known protein coding genes were measured. Checking this option adds in a genome-scale background of non-hits for statistical analysis of the dataset.

Select whether to use only the pathways from the KEGG database that describe biological processes, to use only the pathways associated with disease descriptions, or to use all types of pathways.

Select what confidence to consider for the network interactions used in the analysis. Select from *Low (>0.15)*, *Medium (>0.4)*, or *High (0.7)*.

The dropdown menu includes a list of the column names in the uploaded document. Select the column name that contains the numeric values to be used for the high confidence/medium confidence cutoffs of your targets.

Type in a number to be used as a cutoff for medium confidence hits. (Can be greater than or less than)

Select the column name that contains the numeric values to be used as an additional cutoff criteria.

Enter the direction and value that all high confidence and medium confidence hits must meet in the secondary criteria column.

Click this icon to begin an analysis.

Click this icon to reset the settings and start a new analysis.

**Supplementary Figure 6 (related to figure 6A): Setting up an analysis on SIGNAL.**

Guide for the control panel for setting up an analysis session on the *signal.niaid.nih.gov* web interface.

NCBI EntrezID.

HGNC Gene Symbol.

The confidence category this gene was assigned to at the start of the analysis.

If the gene was selected as a hit by SIGNAL.

Names of KEGG Pathways that were identified by SIGNAL as enriched for in the dataset that the gene is an annotated member of.

The screenshot shows the SIGNAL Gene Hits table with the following columns: EntrezID, GeneSymbol, InputCategory, SIGNALHits, Pathway, InteractingGenes, and NetworkGenePathways. The table contains 10 rows of data. Red lines point from text labels to specific elements in the table: one to the EntrezID column, one to the GeneSymbol column, one to the InputCategory column, one to the SIGNALHits column, one to the Pathway column, one to the InteractingGenes column, and one to the NetworkGenePathways column. The table also includes a search bar, a 'Show 10 entries' dropdown, and a pagination bar at the bottom.

| EntrezID | GeneSymbol | InputCategory | SIGNALHits | Pathway                      | InteractingGenes               | NetworkGenePathways          |
|----------|------------|---------------|------------|------------------------------|--------------------------------|------------------------------|
| 26574    | AATF       | MedConf       | Yes        |                              | HDAC1                          |                              |
| 84448    | ABLIM2     | MedConf       | Yes        |                              | CDC42                          | Focal adhesion (1), MAPK ... |
| 80325    | ABTB1      | MedConf       | Yes        |                              | FBXW11, BTRC                   | Hippo signaling pathway (2)  |
| 39       | ACAT2      | MedConf       | Yes        | Lysine degradation, Pyruv... | HADHA, TRAPPC8, SPR            | Lysine degradation (1), P... |
| 55331    | ACER3      | MedConf       | Yes        |                              | SPHK1                          | Phospholipase D signaling... |
| 58       | ACTA1      | MedConf       | Yes        |                              | PAK2, FLT1, FLT4, MEF2C, CDC42 | MAPK signaling pathway (5... |
| 59       | ACTA2      | MedConf       | Yes        | Relaxin signaling pathway    |                                |                              |
| 102      | ADAM10     | HighConf      | Yes        |                              | EGF                            | EGFR tyrosine kinase inhi... |
| 121536   | AEBP2      | MedConf       | Yes        |                              | BTRC                           | Hippo signaling pathway (1)  |
| 116986   | AGAP2      | HighConf      | Yes        | FoxO signaling pathway       |                                |                              |

Names of SIGNAL gene hits from the analysis that have predicted interactions with the listed hit gene of the row. The interactions are determined based on the network settings set by the user at the start of the analysis.

Names of enriched pathways from the analysis which the interacting genes are members of.

Number in parenthesis indicates the number of Interacting genes that are members of the preceding pathway.

**Supplementary Figure 7 (related to figure 6): SIGNAL Gene Hits table on SIGNAL.** Guide for the “SIGNAL Gene Hits” table generated after an analysis session on *signal.niaid.nih.gov* is complete.



KEGG database pathway name

$p$ -value of pathway enrichment.

$p$ -values with added correction for False Detection Rate.

$p$ -values with the Bonferroni corrections for multiple testing.

Number of genes annotated in the pathway.

Number of pathway genes that are selected as hits by SIGNAL.

Number of hits in the pathway that are assigned as high confidence in the input file.

| Pathway                                                | pVal  | pValFDR | pValBonferroni | Genes | SIGNALHits | HighScoreHitGenes | HighScoreHitGenesNames         | MedScoreGenesNames            | EnrichScore |
|--------------------------------------------------------|-------|---------|----------------|-------|------------|-------------------|--------------------------------|-------------------------------|-------------|
| Glycosylphosphatidylinositol (GPI)-anchor biosynthesis | 0.037 | 0.371   | 1              | 24    | 4          | 3                 | PIGK, PIGH, PIGY               | GPAA1                         | 0.458       |
| N-Glycan biosynthesis                                  | 0.013 | 0.203   | 1              | 48    | 7          | 4                 | DDOST, STT3A, MGAT1, DPM1      | ALG6, MAN2A1, ST6GAL1         | 0.359       |
| Cytosolic DNA-sensing pathway                          | 0.047 | 0.44    | 1              | 62    | 7          | 4                 | POLR3F, POLR3A, RELA, IKBKKG   | IFNA5, POLR2E, POLR3D         | 0.342       |
| RNA polymerase                                         | 0.001 | 0.03    | 0.22           | 30    | 7          | 3                 | POLR3F, POLR3A, ZNRD1          | TWISTNB, POLR2E, POLR2J, ...  | 0.331       |
| RNA transport                                          | 0     | 0       | 0              | 153   | 29         | 11                | CLNS1A, NUP160, NUP133, N...   | POP7, PAIP1, RPP25L, EEF1...  | 0.284       |
| FoxO signaling pathway                                 | 0.02  | 0.267   | 1              | 128   | 13         | 6                 | GABARAPL2, AGAP2, EGF, EG...   | EP300, GRB2, PCK2, PTEN, ...  | 0.282       |
| Autophagy - animal                                     | 0.029 | 0.341   | 1              | 135   | 13         | 6                 | RRAGB, ATG7, GABARAPL2, A...   | RRAS2, MTOR, WDR41, PTEN, ... | 0.279       |
| T cell receptor signaling pathway                      | 0.008 | 0.142   | 1              | 102   | 12         | 5                 | AKT1, LCP2, RELA, IKBKKG, CD4  | MALT1, CSF2, GRB2, NFATC3...  | 0.267       |
| Phospholipase D signaling pathway                      | 0.047 | 0.44    | 1              | 145   | 13         | 5                 | EGF, EGFR, AKT1, PIP5K1C, ARF1 | LPAR1, FCER1A, RRAS2, MTO...  | 0.237       |
| EGFR tyrosine kinase inhibitor resistance              | 0     | 0.005   | 0.015          | 78    | 14         | 4                 | EGF, EGFR, AKT1, JAK1          | EIF4E, FGF2, MTOR, GRB2, ...  | 0.233       |

Gene Symbols of SIGNAL selected hits in the pathway that were assigned as high confidence in the input file.

Gene Symbols of SIGNAL selected hits in the pathway that were assigned as medium confidence in the input file.

A calculation representing the robustness of the pathways enrichments by the number of genes represented in the SIGNAL dataset and how many of them are high scoring. The EnrichScore is calculated as

$$\left( \frac{\text{HitGenes}}{\text{GenesInPathway}} + \frac{\text{HighScoreGenes}}{\text{HitGenes}} \right) / 2$$

**Supplementary Figure 8 (related to figure 6): Pathway Enrichments table in SIGNAL.** Guide for the “Pathway Enrichments” table generated after an analysis session on *signal.niaid.nih.gov* is complete.
